# Supplementary material for: Variability Studies of Two Prunus-Infecting Fabaviruses with the Aid of High-Throughput Sequencing
Source: MDPI journal article supplement (doi:10.3390/v10040204), 2018-04-18
Supplement: s1 [file s1]

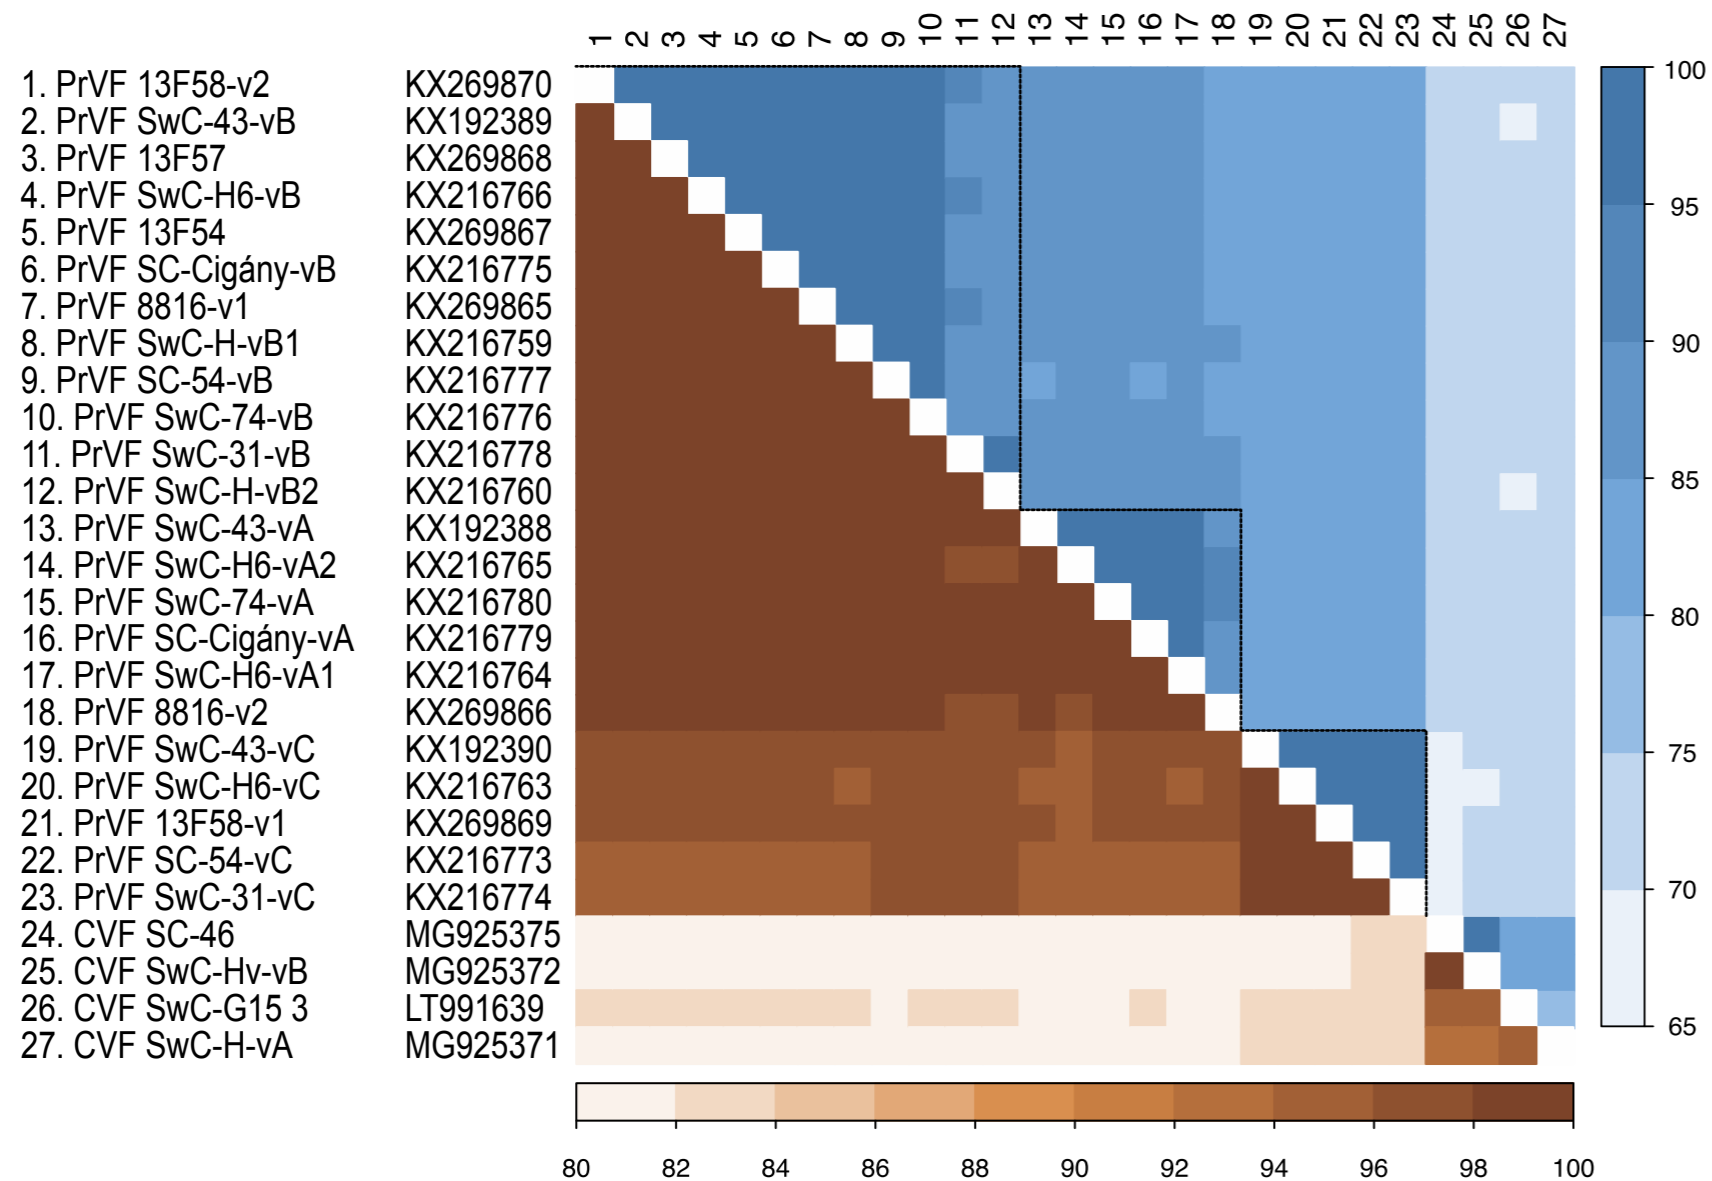

(A)

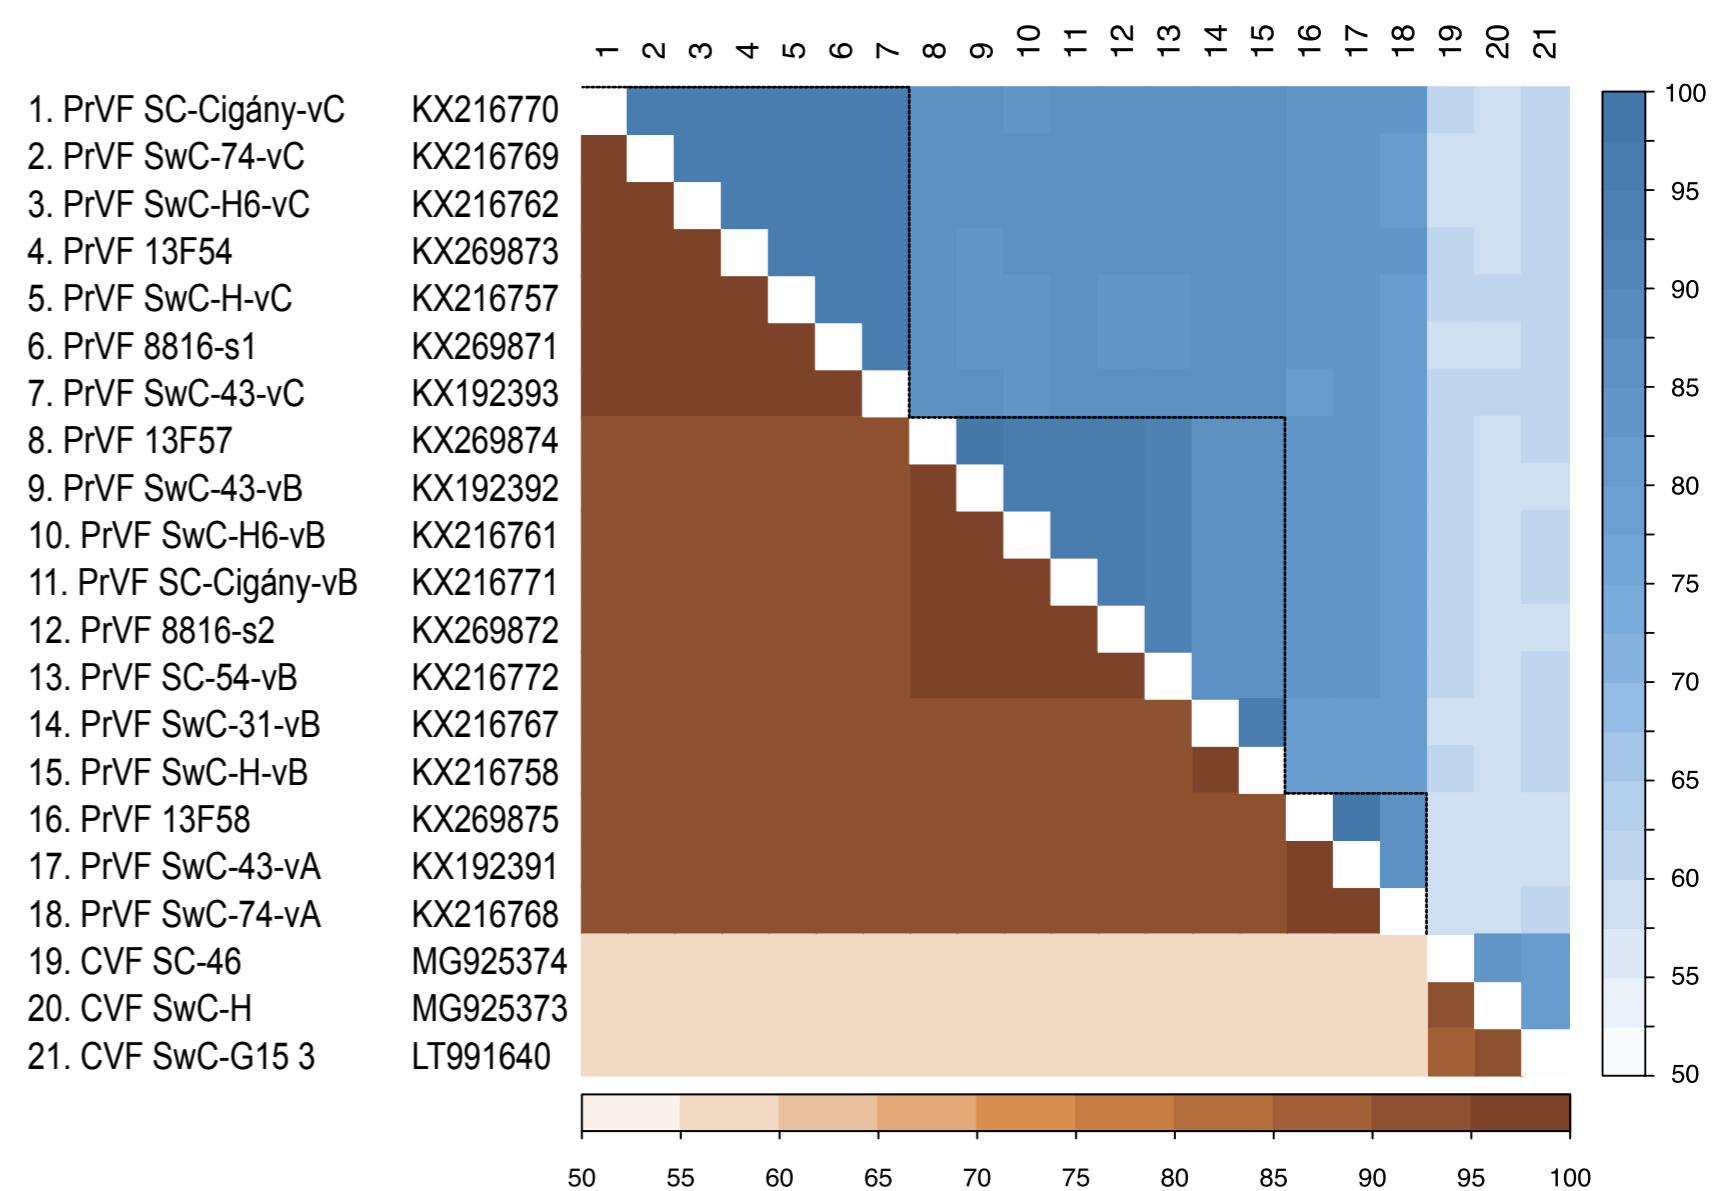

(B)

**Supplementary Figure 1** Pairwise comparison of CG-GDD (A) and CP (B) identities – nucleotide and aminoacid sequence identities are shown above and below the diagonal, respectively.
