# Supplementary material for: Variability Studies of Two Prunus-Infecting Fabaviruses with the Aid of High-Throughput Sequencing
Source: MDPI journal article supplement (doi:10.3390/v10040204), 2018-04-18
Supplement: s1 [file s1]

Supplementary Table 1 List of used primers. Each binding site is listed

| Name | Target            | Accession number | Position    | Direction | Usage                                 | Sequence, 5' - 3' direction |
|------|-------------------|------------------|-------------|-----------|---------------------------------------|-----------------------------|
| 1007 | CVF SwC-H RNA1B   | MG925372         | 336 – 357   | reverse   | 5' RACE                               | GATGCCITTTTGACTTTCTCAT      |
| 1009 | PrVF SwC-43 RNA2C | KX192393         | 903 – 922   | reverse   | sequencing                            | ATTTTGTGCAACCAATCCGT        |
| 1010 | PrVF SwC-43 RNA2C | KX192393         | 805 – 823   | reverse   | sequencing                            | CATGCCATAAACCACTGGA         |
| 1010 | PrVF SwC-43 RNA2B | KX192392         | 828 – 846   | reverse   | sequencing                            | CATGCCATAAACCACTGGA         |
| 1011 | PrVF SwC-43 RNA2B | KX192392         | 757 – 776   | reverse   | sequencing                            | TGATTGCCACCAAGTCTGT         |
| 1012 | PrVF SwC-43 RNA2B | KX192392         | 481 – 502   | reverse   | 5' RACE                               | GRAAYGCCATCYTTTCAAGCTT      |
| 1012 | PrVF SwC-43 RNA2C | KX192393         | 458 – 479   | reverse   | 5' RACE                               | GRAAYGCCATCYTTTCAAGCTT      |
| 1012 | PrVF SwC-43 RNA2B | KX192392         | 481 – 502   | reverse   | 5' RACE                               | GRAAYGCCATCYTTTCAAGCTT      |
| 1012 | PrVF SwC-43 RNA2C | KX192393         | 458 – 479   | reverse   | 5' RACE                               | GRAAYGCCATCYTTTCAAGCTT      |
| 1013 | PrVF SwC-43 RNA2B | KX192392         | 3182 – 3202 | forward   | 3' RACE                               | GAAGTGATCCAAAAACAATA        |
| 1014 | PrVF SwC-43 RNA2A | KX192391         | 891 – 910   | reverse   | sequencing                            | ACCATCCACAAAATCTCTA         |
| 1015 | PrVF SwC-43 RNA1C | KX192390         | 642 – 664   | reverse   | 5' RACE                               | CTGTGCACITTTTCATAGTCACA     |
| 1016 | PrVF SwC-43 RNA1C | KX192390         | 5300 – 5319 | forward   | sequencing                            | AGGAGTGCATGGACCTACGT        |
| 1017 | PrVF SwC-43 RNA1B | KX192389         | 798 – 818   | reverse   | 5' RACE                               | TATGCTCCGCCACAGCTTGA        |
| 1018 | PrVF SwC-43 RNA1A | KX192388         | 862 – 881   | reverse   | 5' RACE                               | AGACCCATAACAACACTATC        |
| 1018 | PrVF SwC-43 RNA1B | KX192389         | 857 – 876   | reverse   | 5' RACE                               | AGACCCATAACAACACTATC        |
| 1019 | PrVF SwC-43 RNA1A | KX192388         | 803 – 825   | reverse   | 5' RACE                               | TATATGTTCTGCCAAAAGTTTAA     |
| 1020 | PrVF SwC-43 RNA1A | KX192388         | 613 – 635   | reverse   | 5' RACE                               | AAAGATGCACAYGARGACATAAG     |
| 1020 | PrVF SwC-43 RNA1C | KX192390         | 601 – 623   | reverse   | 5' RACE                               | AAAGATGCACAYGARGACATAAG     |
| 1020 | PrVF SwC-43 RNA1B | KX192389         | 608 – 630   | reverse   | 5' RACE                               | AAAGATGCACAYGARGACATAAG     |
| 1029 | PrVF SwC-43 RNA2C | KX192393         | 268 – 289   | reverse   | 5' RACE                               | CTCCTCGTATTCAAGCCAAGTT      |
| 1030 | PrVF SwC-43 RNA2B | KX192392         | 318 – 339   | reverse   | 5' RACE                               | CACGAACGTGGATGTGTAATCA      |
| 1031 | PrVF SwC-43 RNA2A | KX192391         | 301 – 321   | reverse   | 5' RACE                               | GACACAAACGTAAAGGTTCTGA      |
| 1034 | PrVF SwC-43 RNA1B | KX192389         | 990 – 1012  | reverse   | 5' RACE                               | AGCTTTRTAWCCACATATAGCTC     |
| 1034 | PrVF SwC-43 RNA1A | KX192388         | 995 – 1017  | reverse   | 5' RACE                               | AGCTTTRTAWCCACATATAGCTC     |
| 1037 | PrVF SwC-43 RNA1B | KX192389         | 5 – 27      | forward   | nearly complete segment amplification | TAAGAGATTAACAACCCGCTTTC     |
| 1037 | PrVF SwC-43 RNA1C | KX192390         | 5 – 27      | forward   | nearly complete segment amplification | TAAGAGATTAACAACCCGCTTTC     |
| 1037 | PrVF SwC-43 RNA2C | KX192393         | 5 – 27      | forward   | nearly complete segment amplification | TAAGAGATTAACAACCCGCTTTC     |
| 1037 | PrVF SwC-43 RNA2A | KX192391         | 5 – 27      | forward   | nearly complete segment amplification | TAAGAGATTAACAACCCGCTTTC     |
| 1037 | PrVF SwC-43 RNA2B | KX192392         | 5 – 27      | forward   | nearly complete segment amplification | TAAGAGATTAACAACCCGCTTTC     |
| 1037 | PrVF SwC-43 RNA1A | KX192388         | 5 – 27      | forward   | nearly complete segment amplification | TAAGAGATTAACAACCCGCTTTC     |
| 1038 | PrVF SwC-43 RNA2C | KX192393         | 3725 – 3744 | reverse   | nearly complete segment amplification | GCTTTCACCAATTCTCAACA        |
| 1038 | PrVF SwC-43 RNA1A | KX192388         | 6132 – 6151 | reverse   | nearly complete segment amplification | GCTTTCACCAATTCTCAACA        |
| 1038 | PrVF SwC-43 RNA2A | KX192391         | 3571 – 3590 | reverse   | nearly complete segment amplification | GCTTTCACCAATTCTCAACA        |
| 1038 | PrVF SwC-43 RNA1B | KX192389         | 6134 – 6153 | reverse   | nearly complete segment amplification | GCTTTCACCAATTCTCAACA        |
| 1038 | CVF SwC-H RNA1B   | MG925372         | 6157 – 6176 | reverse   | nearly complete segment amplification | GCTTTCACCAATTCTCAACA        |
| 1038 | CVF SwC-H RNA2    | MG925373         | 3828 – 3847 | reverse   | nearly complete segment amplification | GCTTTCACCAATTCTCAACA        |
| 1038 | PrVF SwC-43 RNA2B | KX192392         | 3434 – 3453 | reverse   | nearly complete segment amplification | GCTTTCACCAATTCTCAACA        |
| 1039 | CVF SwC-H RNA2    | MG925373         | 139 – 159   | forward   | 5' RACE                               | TGGTTACCAAGCCCTCATT         |
| 1083 | PrVF SwC-43 RNA1A | KX192388         | 103 – 120   | forward   | nearly complete segment amplification | GTGGTTACTCGTGCCTT           |
| 1083 | PrVF SwC-43 RNA1B | KX192389         | 98 – 115    | forward   | nearly complete segment amplification | GTGGTTACTCGTGCCTT           |
| 1083 | PrVF SwC-43 RNA1C | KX192390         | 95 – 112    | forward   | nearly complete segment amplification | GTGGTTACTCGTGCCTT           |
| 1150 | PrVF SwC-43 RNA1C | KX192390         | 3408 – 3430 | forward   | sequencing                            | GGATAGTGAACCTGCAGTATATC     |
| 1406 | CVF SwC-H RNA1B   | MG925372         | 369 – 388   | reverse   | 5' RACE                               | GTGCACCCAAAGAACATCTT        |
| 1407 | CVF SwC-H RNA2    | MG925373         | 282 – 301   | reverse   | 5' RACE                               | TCCTCACTGTCTCGTACTC         |
| 1408 | CVF SwC-H RNA2    | MG925373         | 382 – 401   | reverse   | 5' RACE                               | AACAAGGAATGAGCAACGT         |
| 1409 | CVF SwC-H RNA2    | MG925373         | 848 – 867   | reverse   | sequencing                            | AAGGAACAGGCACATCAATC        |
| 1445 | CVF SwC-H RNA2    | MG925373         | 274 – 295   | reverse   | 5' RACE                               | ACTGTCTCGTACTCTCCCTTGA      |
| 1446 | CVF SwC-H RNA1A   | MG925371         | 5890 – 5911 | forward   | 3' RACE                               | CAGCAAAACAAGAATCTGGGAT      |
| 1447 | CVF SwC-H RNA1B   | MG925372         | 222 – 242   | reverse   | 5' RACE                               | AGAACCATCAGAGTGAATGCT       |
| 1448 | CVF SwC-H RNA1A   | MG925371         | 429 – 449   | reverse   | 5' RACE                               | TCTGAGACAAGAAGGGTTGGA       |
| 1449 | CVF SwC-H RNA1B   | MG925372         | 5837 – 5856 | forward   | 3' RACE                               | TTGTGGAGCCTTGGCTGTAG        |
| 1450 | CVF SwC-H RNA1A   | MG925371         | 5984 – 6003 | forward   | 3' RACE                               | TTCCAGTGTGTTGGCAGACA        |
| 1450 | CVF SwC-H RNA1B   | MG925372         | 6004 – 6023 | forward   | sequencing                            | TTCCAGTGTGTTGGCAGACA        |
| 1450 | CVF SwC-H RNA2    | MG925373         | 3354 – 3373 | forward   | 3' RACE                               | TTCCAGTGTGTTGGCAGACA        |
| 1451 | CVF SwC-H RNA2    | MG925373         | 3281 – 3300 | forward   | sequencing                            | TGTCAGCATTGCCACTCTCT        |
| 1452 | CVF SwC-H RNA1B   | MG925372         | 138 – 156   | reverse   | 5' RACE                               | GAAATGAGGGCTTGGGTAA         |
| 1452 | CVF SwC-H RNA1A   | MG925371         | 163 – 181   | reverse   | 5' RACE                               | GAAATGAGGGCTTGGGTAA         |
| 1542 | CVF SwC-H RNA2    | MG925373         | 589 – 608   | reverse   | 5' RACE                               | AGATGTTATAGTGCAGAGAAG       |

|      |                   |          |             |         |                         |                            |
|------|-------------------|----------|-------------|---------|-------------------------|----------------------------|
| 1543 | CVF SwC-H RNA1A   | MG925371 | 303 – 323   | reverse | 5' RACE                 | TCATCAAGATCCACAATTCCC      |
| 1544 | CVF SwC-H RNA1A   | MG925371 | 223 – 241   | reverse | 5' RACE                 | CACAAATCAGCTGGAACACA       |
| 1562 | CVF SwC-H RNA2    | MG925373 | 1614 – 1633 | forward | sequencing              | GAAGTTGAGATGAGTATGCC       |
| 1632 | CVF SwC-H RNA1A   | MG925371 | 100 – 119   | reverse | 5' RACE                 | TCAACCAAAGAGCAGACGAA       |
| 818  | PrVF SwC-43 RNA2B | KX192392 | 3153 – 3173 | reverse | sequencing              | CCTCCAGCACTTCCAGAAACA      |
| 819  | PrVF SwC-43 RNA2B | KX192392 | 2621 – 2644 | forward | sequencing              | GTGGATACCCTTTCTCTGCATCTC   |
| 820  | PrVF SwC-43 RNA1A | KX192388 | 4411 – 4431 | reverse | sequencing              | ACACTCGATTCCCACTC          |
| 821  | PrVF SwC-43 RNA1A | KX192388 | 4238 – 4262 | reverse | sequencing              | CCTTCGAAAGTCCCTATCACTAGAG  |
| 822  | PrVF SwC-43 RNA1A | KX192388 | 3983 – 4004 | forward | sequencing              | CCTGTGAAAAGATACCCAGCGT     |
| 823  | PrVF SwC-43 RNA1A | KX192388 | 3651 – 3673 | forward | sequencing              | GATACCTCGTTTCATGACCTACG    |
| 827  | PrVF SwC-43 RNA2C | KX192393 | 220 – 238   | forward | 5' RACE                 | GGGCTTTGAAACATACGCT        |
| 827  | PrVF SwC-43 RNA2C | KX192393 | 220 – 238   | forward | 5' RACE                 | GGGCTTTGAAACATACGCT        |
| 829  | PrVF SwC-43 RNA2B | KX192392 | 1426 – 1446 | forward | sequencing              | CTTCAATTGACAATCCGAAC       |
| 829  | PrVF SwC-43 RNA2C | KX192393 | 1403 – 1423 | forward | sequencing              | CTTCAATTGACAATCCGAAC       |
| 830  | PrVF SwC-43 RNA2B | KX192392 | 1421 – 1442 | reverse | sequencing              | GGATTGTCAAATGAAGAACA       |
| 830  | PrVF SwC-43 RNA2C | KX192393 | 1398 – 1419 | reverse | sequencing              | GGATTGTCAAATGAAGAACA       |
| 833  | PrVF SwC-43 RNA1B | KX192389 | 5828 – 5845 | forward | sequencing              | AGGGAGGATTGCAACGTC         |
| 834  | PrVF SwC-43 RNA1B | KX192389 | 5824 – 5842 | reverse | sequencing              | GTTCGAATCCTCCTCTTG         |
| 835  | PrVF SwC-43 RNA1B | KX192389 | 4343 – 4359 | forward | sequencing              | CCCGATTCAAAGTTGC           |
| 838  | PrVF SwC-43 RNA1B | KX192389 | 2556 – 2579 | forward | sequencing              | TTGAAAGGGCATCTTGTATGTGT    |
| 839  | PrVF SwC-43 RNA1A | KX192388 | 1307 – 1328 | reverse | sequencing              | TGTCTAAACACCAATTCTGAG      |
| 840  | PrVF SwC-43 RNA1A | KX192388 | 1307 – 1329 | forward | sequencing              | CTCAGAATTGGGTGTTAGACAG     |
| 841  | PrVF SwC-43 RNA1C | KX192390 | 267 – 285   | forward | 5' RACE                 | CACCTTCACTTTGGTTGCT        |
| 850  | PrVF SwC-43 RNA2C | KX192393 | 326 – 343   | reverse | 5' RACE                 | ACGCTTACAGGGAGTGAG         |
| 851  | PrVF SwC-43 RNA2C | KX192393 | 217 – 239   | reverse | 5' RACE                 | CAGCGTATGTTTCAAGCCCGTA     |
| 853  | PrVF SwC-43 RNA1B | KX192389 | 439 – 456   | reverse | 5' RACE                 | ATGTCCACCCTCATCC           |
| 854  | PrVF SwC-43 RNA1C | KX192390 | 269 – 291   | reverse | 5' RACE                 | ACCTCCAGCAACCAAGTGAAGG     |
| 857  | PrVF SwC-43 RNA1B | KX192389 | 1068 – 1088 | forward | sequencing              | TGGTCAAAGGATCATGCATGG      |
| 870  | PrVF SwC-43 RNA2A | KX192391 | 1634 – 1655 | reverse | sequencing              | CTGCCATAGAGAAGGAGCCAG      |
| 871  | PrVF SwC-43 RNA1C | KX192390 | 23 – 48     | forward | sequencing              | CTTTCGATACCAGCTCTTCTTAAAGC |
| 927  | PrVF SwC-43 RNA1C | KX192390 | 3479 – 3501 | forward | sequencing              | TTTTTGATGGAGAGAGATCTT      |
| 930  | CVF SwC-H RNA1B   | MG925372 | 3556 – 3578 | forward | sequencing              | TCCTTTCATACAAGTATTATGCT    |
| 931  | PrVF SwC-43 RNA1C | KX192390 | 3563 – 3586 | forward | RNA1 universal          | TTCCYGARATTGCYAAGATWGATG   |
| 931  | PrVF SwC-43 RNA1A | KX192388 | 3575 – 3598 | forward | RNA1 universal          | TTCCYGARATTGCYAAGATWGATG   |
| 931  | CVF SwC-H RNA1B   | MG925372 | 3595 – 3618 | forward | RNA1 universal          | TTCCYGARATTGCYAAGATWGATG   |
| 931  | PrVF SwC-43 RNA1C | KX192390 | 3563 – 3586 | forward | RNA1 universal          | TTCCYGARATTGCYAAGATWGATG   |
| 931  | PrVF SwC-43 RNA1B | KX192389 | 3570 – 3593 | forward | RNA1 universal          | TTCCYGARATTGCYAAGATWGATG   |
| 932  | PrVF SwC-43 RNA1A | KX192388 | 5059 – 5081 | reverse | RNA1 universal          | ATRGTKATRTGSADYTTKCCCAT    |
| 932  | CVF SwC-H RNA1B   | MG925372 | 5079 – 5101 | reverse | RNA1 universal          | ATRGTKATRTGSADYTTKCCCAT    |
| 932  | PrVF SwC-43 RNA1C | KX192390 | 5047 – 5069 | reverse | RNA1 universal          | ATRGTKATRTGSADYTTKCCCAT    |
| 932  | PrVF SwC-43 RNA1B | KX192389 | 5054 – 5076 | reverse | RNA1 universal          | ATRGTKATRTGSADYTTKCCCAT    |
| 932  | PrVF SwC-43 RNA1C | KX192390 | 5047 – 5069 | reverse | RNA1 universal          | ATRGTKATRTGSADYTTKCCCAT    |
| 933  | PrVF SwC-43 RNA1C | KX192390 | 5056 – 5078 | reverse | sequencing              | CCATCTGTAATGGTTATGTGCAA    |
| 935  | CVF SwC-H RNA1B   | MG925372 | 5145 – 5168 | reverse | sequencing              | GAGAAAATCGCACTTGTCAAGAGT   |
| 950  | PrVF SwC-43 RNA2C | KX192393 | 3092 – 3114 | forward | 3' RACE, RNA2 universal | GGHHWVAYWCTYATGGCYAARTT    |
| 950  | PrVF SwC-43 RNA2B | KX192392 | 3115 – 3137 | forward | 3' RACE, RNA2 universal | GGHHWVAYWCTYATGGCYAARTT    |
| 950  | PrVF SwC-43 RNA2A | KX192391 | 3095 – 3117 | forward | 3' RACE, RNA2 universal | GGHHWVAYWCTYATGGCYAARTT    |
| 951  | PrVF SwC-43 RNA1A | KX192388 | 5570 – 5591 | forward | sequencing              | CRAAYGACTATGTTGTTGGCT      |
| 951  | PrVF SwC-43 RNA1B | KX192389 | 5565 – 5586 | forward | sequencing              | CRAAYGACTATGTTGTTGGCT      |
| 952  | PrVF SwC-43 RNA1C | KX192390 | 4759 – 4778 | reverse | RNA1 universal          | GCCATBARNAGATTYCTCG        |
| 952  | PrVF SwC-43 RNA1B | KX192389 | 4766 – 4785 | reverse | RNA1 universal          | GCCATBARNAGATTYCTCG        |
| 952  | PrVF SwC-43 RNA1A | KX192388 | 4771 – 4790 | reverse | RNA1 universal          | GCCATBARNAGATTYCTCG        |
| 953  | PrVF SwC-43 RNA2C | KX192393 | 3269 – 3292 | reverse | sequencing              | GRAGARYCAAACAGAATARGTGTC   |
| 953  | PrVF SwC-43 RNA2B | KX192392 | 3296 – 3319 | reverse | sequencing              | GRAGARYCAAACAGAATARGTGTC   |
| 953  | CVF SwC-H RNA1B   | MG925372 | 6020 – 6043 | reverse | RNA2 universal          | GRAGARYCAAACAGAATARGTGTC   |
| 953  | PrVF SwC-43 RNA1A | KX192388 | 5994 – 6017 | reverse | RNA2 universal          | GRAGARYCAAACAGAATARGTGTC   |
| 953  | PrVF SwC-43 RNA1B | KX192389 | 5996 – 6019 | reverse | sequencing              | GRAGARYCAAACAGAATARGTGTC   |
| 953  | PrVF SwC-43 RNA2A | KX192391 | 3284 – 3307 | reverse | RNA2 universal          | GRAGARYCAAACAGAATARGTGTC   |
| 954  | PrVF SwC-43 RNA2C | KX192393 | 1557 – 1577 | forward | sequencing              | CTGGTGAATGACCCAGCGTG       |
| 957  | PrVF SwC-43 RNA2C | KX192393 | 3234 – 3258 | reverse | 3' RACE                 | CTGGAAAATCTCCAGTAGTCCAAT   |
| 957  | PrVF SwC-43 RNA2C | KX192393 | 3234 – 3258 | reverse | 3' RACE                 | CTGGAAAATCTCCAGTAGTCCAAT   |
| 958  | PrVF SwC-43 RNA2C | KX192393 | 1308 – 1333 | forward | sequencing              | CAAATATTCCATCCGTTTGGTAGG   |

|             |                    |          |             |         |            |                             |
|-------------|--------------------|----------|-------------|---------|------------|-----------------------------|
| 959         | PrVF SwC-43 RNA2B  | KX192392 | 1532 – 1557 | forward | sequencing | AAGCTGTTTCTCTTTGGAAGTTGAA   |
| 960         | PrVF SwC-43 RNA2B  | KX192392 | 3354 – 3376 | reverse | 3' RACE    | CAGGTGGGACTCGAAATCCAACG     |
| 960         | PrVF SwC-43 RNA1A  | KX192388 | 6052 – 6074 | reverse | 3' RACE    | CAGGTGGGACTCGAAATCCAACG     |
| 960         | PrVF SwC-43 RNA1B  | KX192389 | 6054 – 6076 | reverse | 3' RACE    | CAGGTGGGACTCGAAATCCAACG     |
| 961         | PrVF SwC-43 RNA2A  | KX192391 | 1637 – 1664 | forward | sequencing | GCTTCTTCTCTATGGCAGATGTTATAT |
| 962         | PrVF SwC-43 RNA1B  | KX192389 | 4548 – 4570 | forward | sequencing | TTCTCATGAARARAAGRAGTGTG     |
| 962         | PrVF SwC-43 RNA1C  | KX192390 | 4541 – 4563 | forward | sequencing | TTCTCATGAARARAAGRAGTGTG     |
| 991         | PrVF SwC-43 RNA1C  | KX192390 | 5869 – 5889 | forward | sequencing | AGTTTGGGTATCTTCTCTGAA       |
| 992         | PrVF SwC-43 RNA1A  | KX192388 | 5321 – 5342 | forward | sequencing | TAAACTGCGAAGAAAAGCTCT       |
| 993         | PrVF SwC-43 RNA1B  | KX192389 | 5277 – 5297 | forward | sequencing | TTTTGCGAGAACCTTTTCTAC       |
| 994         | CVF SwC-H RNA1B    | MG925372 | 5835 – 5853 | forward | 3' RACE    | CGTTGTGGAGCCTTGCTG          |
| 123Up       | CVF SwC-G15 3 RNA1 | LT991639 | 172-191     | reverse | sequencing | ACTCTCACGTTGGTTGTAGG        |
| 622Do       | CVF SwC-G15 3 RNA1 | LT991639 | 656-679     | forward | sequencing | CAAGAACATTGTAGACATGAGGAC    |
| 422up       | CVF SwC-G15 3 RNA1 | LT991639 | 482-502     | reverse | sequencing | TTGCTTCTCAGTCTTCATCCT       |
| 728do       | CVF SwC-G15 3 RNA1 | LT991639 | 768-788     | forward | sequencing | GCCAGGCCATCACGACACAT        |
| 622UP       | CVF SwC-G15 3 RNA1 | LT991639 | 656-679     | reverse | sequencing | GTCCTCATGTCTACAATGTTCTTG    |
| 847do       | CVF SwC-G15 3 RNA1 | LT991639 | 987-1006    | forward | sequencing | CCAGTAGAGACATGCAGGAG        |
| 826UP       | CVF SwC-G15 3 RNA1 | LT991639 | 886-906     | reverse | sequencing | ACATTTTCTATTGGGGCTGTT       |
| 1118DO      | CVF SwC-G15 3 RNA1 | LT991639 | 1158-1178   | forward | sequencing | ATAAAAGCTGCCATTGTTCT        |
| 847Up       | CVF SwC-G15 3 RNA1 | LT991639 | 987-1006    | reverse | sequencing | CTCCTGCATGTCTACTG           |
| 1760Do      | CVF SwC-G15 3 RNA1 | LT991639 | 1795-1816   | forward | sequencing | TTTGTGTGAGTGAGCTTTTCC       |
| 1568UP      | CVF SwC-G15 3 RNA1 | LT991639 | 1628-1649   | reverse | sequencing | GCAGTGTTTTCATAGGAAGTGA      |
| 1850DO      | CVF SwC-G15 3 RNA1 | LT991639 | 1628-1649   | forward | sequencing | CGACGATAGCCAGACCAAAA        |
| 1760UP      | CVF SwC-G15 3 RNA1 | LT991639 | 1795-1816   | reverse | sequencing | GGAAAAGCTCACTCACACAAA       |
| 2546DO      | CVF SwC-G15 3 RNA1 | LT991639 | 2602-2626   | forward | sequencing | CCAATTGATGATTAGGCAGAACA     |
| 2464UP      | CVF SwC-G15 3 RNA1 | LT991639 | 2524-2544   | reverse | sequencing | GTGACTCTTGTGGGATTGTC        |
| 2671DO      | CVF SwC-G15 3 RNA1 | LT991639 | 2713-2733   | forward | sequencing | CTTTCGGGTAGTATCAGG          |
| 2546Up      | CVF SwC-G15 3 RNA1 | LT991639 | 2602-2626   | reverse | sequencing | TGTTCTGCCTAATCATCAAATGG     |
| 3299Do      | CVF SwC-G15 3 RNA1 | LT991639 | 3338-3357   | forward | sequencing | CCGATAGACAGCCAACCTCAC       |
| 3140Up      | CVF SwC-G15 3 RNA1 | LT991639 | 3198-3220   | reverse | sequencing | TGTTCTGCCTAATCATCAAATGG     |
| 3865Do      | CVF SwC-G15 3 RNA1 | LT991639 | 3899-3923   | forward | sequencing | GTTATTACGCTGGGTATCTTTTCAC   |
| 3530Up      | CVF SwC-G15 3 RNA1 | LT991639 | 3588-3609   | reverse | sequencing | TGCTGAAACTATAGACGGTGAC      |
| 4391Do      | CVF SwC-G15 3 RNA1 | LT991639 | 4429-4449   | forward | sequencing | GAATTTTCATGCGCACAAACAAG     |
| 4263Up      | CVF SwC-G15 3 RNA1 | LT991639 | 4321-4341   | reverse | sequencing | CCTGAACTGTTTGGAAATCGAG      |
| 5103Do      | CVF SwC-G15 3 RNA1 | LT991639 | 5140-5160   | forward | sequencing | TTCAAGGTTACGCGTGTGAC        |
| 4939UP      | CVF SwC-G15 3 RNA1 | LT991639 | 4979-5001   | reverse | sequencing | AAATGCACATCACCATCACTGAT     |
| CVF-3UTR do | CVF SwC-G15 3 RNA1 | LT991639 | 5925-5945   | forward | sequencing | AGCAGGCYTGAGAGCCAAAC        |
| 141UP       | CVF SwC-G15 3 RNA2 | LT991640 | 141-161     | reverse | sequencing | GTGGTTACCAAAGCCCTCATT       |
| 712DO       | CVF SwC-G15 3 RNA2 | LT991640 | 800-820     | forward | sequencing | ACATTTTCAATTGCGCTGGTG       |
| 571Up       | CVF SwC-G15 3 RNA2 | LT991640 | 679-699     | reverse | sequencing | CCTACCGTGAACAGCTTCCCTC      |
| 1325Do      | CVF SwC-G15 3 RNA2 | LT991640 | 1411-1433   | forward | sequencing | AACAGATCTTGAGAAGGGTATGG     |
| 951Up       | CVF SwC-G15 3 RNA2 | LT991640 | 1059-1080   | reverse | sequencing | CAAGATGCGCGTAATGCTTTTC      |
| 1850Do      | CVF SwC-G15 3 RNA2 | LT991640 | 1941-1961   | forward | sequencing | ACAAGCGGGATTCCAAAAGAC       |
| 1724Up      | CVF SwC-G15 3 RNA2 | LT991640 | 1835-1854   | reverse | sequencing | TTTGATTCTCTCCTGCGTGTG       |
| 2515Do      | CVF SwC-G15 3 RNA2 | LT991640 | 2605-2626   | forward | sequencing | ACACTAGAAAGTACGCTATCAC      |
| 2425UP      | CVF SwC-G15 3 RNA2 | LT991640 | 2539-2561   | reverse | sequencing | CCAATTCTGCTAGTGTCAATCAT     |
| R2-3END R   | CVF SwC-G15 3 RNA2 | LT991640 | 3887-3906   | forward | sequencing | TGGGCTTTCACCATCTCA          |

Supplementary Table 1 Expected sizes of PCR amplified bands with the above-listed primers

| Target sequence    | Accession number | Fwd. primer name | Rev. primer name | Fragment length, bp |
|--------------------|------------------|------------------|------------------|---------------------|
| CVF SwC-G15 3 RNA2 | LT991640         | 571Up            | 1325Do           | 755                 |
| CVF SwC-G15 3 RNA2 | LT991640         | 571Up            | 1850Do           | 1277                |
| CVF SwC-G15 3 RNA2 | LT991640         | 571Up            | 2515Do           | 1942                |
| CVF SwC-G15 3 RNA2 | LT991640         | 951Up            | 1850Do           | 897                 |
| CVF SwC-G15 3 RNA2 | LT991640         | 951Up            | 2515Do           | 1562                |
| CVF SwC-G15 3 RNA2 | LT991640         | 1724Up           | 2515Do           | 792                 |
| CVF SwC-G15 3 RNA1 | LT991639         | 123Up            | 847do            | 835                 |
| CVF SwC-G15 3 RNA1 | LT991639         | 123Up            | 1118DO           | 1007                |
| CVF SwC-G15 3 RNA1 | LT991639         | 123Up            | 1760DO           | 1645                |
| CVF SwC-G15 3 RNA1 | LT991639         | 123Up            | 1850DO           | 1739                |

| Target sequence    | Accession number | Fwd. primer name | Rev. primer name | Fragment length, bp |
|--------------------|------------------|------------------|------------------|---------------------|
| CVF SwC-G15 3 RNA1 | LT991639         | 123Up            | 2671DO           | 2562                |
| CVF SwC-G15 3 RNA1 | LT991639         | 422up            | 1760Do           | 1335                |
| CVF SwC-G15 3 RNA1 | LT991639         | 422up            | 1850DO           | 1429                |
| CVF SwC-G15 3 RNA1 | LT991639         | 422up            | 2671DO           | 2252                |
| CVF SwC-G15 3 RNA1 | LT991639         | 422up            | 2546DO           | 2739                |
| CVF SwC-G15 3 RNA1 | LT991639         | 422up            | 3299Do           | 2876                |
| CVF SwC-G15 3 RNA1 | LT991639         | 622UP            | 1760Do           | 1161                |
| CVF SwC-G15 3 RNA1 | LT991639         | 622UP            | 1850DO           | 1255                |
| CVF SwC-G15 3 RNA1 | LT991639         | 622UP            | 2671DO           | 2078                |
| CVF SwC-G15 3 RNA1 | LT991639         | 622UP            | 2546DO           | 2565                |
| CVF SwC-G15 3 RNA1 | LT991639         | 622UP            | 3299Do           | 2702                |
| CVF SwC-G15 3 RNA1 | LT991639         | 826UP            | 1760Do           | 931                 |
| CVF SwC-G15 3 RNA1 | LT991639         | 826UP            | 1850DO           | 1025                |
| CVF SwC-G15 3 RNA1 | LT991639         | 826UP            | 2671DO           | 1848                |
| CVF SwC-G15 3 RNA1 | LT991639         | 826UP            | 2546DO           | 2335                |
| CVF SwC-G15 3 RNA1 | LT991639         | 826UP            | 3299Do           | 2472                |
| CVF SwC-G15 3 RNA1 | LT991639         | 1568UP           | 2671DO           | 1106                |
| CVF SwC-G15 3 RNA1 | LT991639         | 1568UP           | 2546DO           | 1593                |
| CVF SwC-G15 3 RNA1 | LT991639         | 1568UP           | 3299Do           | 1730                |
| CVF SwC-G15 3 RNA1 | LT991639         | 1568UP           | 3865Do           | 2296                |
| CVF SwC-G15 3 RNA1 | LT991639         | 1568UP           | 4391Do           | 2822                |
| CVF SwC-G15 3 RNA1 | LT991639         | 2464UP           | 3299Do           | 834                 |
| CVF SwC-G15 3 RNA1 | LT991639         | 2464UP           | 3865Do           | 1400                |
| CVF SwC-G15 3 RNA1 | LT991639         | 2464UP           | 4391Do           | 1926                |
| CVF SwC-G15 3 RNA1 | LT991639         | 2464UP           | 5103Do           | 2637                |
| CVF SwC-G15 3 RNA1 | LT991639         | 2546Up           | 3865Do           | 726                 |
| CVF SwC-G15 3 RNA1 | LT991639         | 2546Up           | 4391Do           | 1252                |
| CVF SwC-G15 3 RNA1 | LT991639         | 2546Up           | 5103Do           | 1963                |
| CVF SwC-G15 3 RNA1 | LT991639         | 3140Up           | 3865Do           | 726                 |
| CVF SwC-G15 3 RNA1 | LT991639         | 3140Up           | 4391Do           | 1252                |
| CVF SwC-G15 3 RNA1 | LT991639         | 3140Up           | 5103Do           | 1963                |
| CVF SwC-G15 3 RNA1 | LT991639         | 3530Up           | 4391Do           | 862                 |
| CVF SwC-G15 3 RNA1 | LT991639         | 3530Up           | 5103Do           | 1573                |
| CVF SwC-G15 3 RNA1 | LT991639         | 4263Up           | 5103Do           | 840                 |
| CVF SwC-H RNA2     | MG925373         | 1037             | 1409             | 863                 |
| CVF SwC-H RNA2     | MG925373         | 1037             | 1038             | 3843                |
| CVF SwC-H RNA2     | MG925373         | 1039             | 1038             | 3709                |
| CVF SwC-H RNA2     | MG925373         | 1562             | 1038             | 2234                |
| CVF SwC-H RNA1B    | MG925372         | 1037             | 1038             | 6174                |
| CVF SwC-H RNA1B    | MG925372         | 930              | 952              | 1255                |
| CVF SwC-H RNA1B    | MG925372         | 930              | 932              | 1546                |
| CVF SwC-H RNA1B    | MG925372         | 930              | 935              | 1613                |
| CVF SwC-H RNA1B    | MG925372         | 930              | 953              | 2488                |
| CVF SwC-H RNA1B    | MG925372         | 930              | 1038             | 2621                |
| CVF SwC-H RNA1B    | MG925372         | 931              | 952              | 1216                |
| CVF SwC-H RNA1B    | MG925372         | 931              | 932              | 1507                |
| CVF SwC-H RNA1B    | MG925372         | 931              | 935              | 1574                |
| CVF SwC-H RNA1B    | MG925372         | 931              | 953              | 2449                |
| CVF SwC-H RNA1B    | MG925372         | 931              | 1038             | 2582                |
| PrVF SwC-43 RNA1A  | KX192388         | 1037             | 1019             | 821                 |
| PrVF SwC-43 RNA1A  | KX192388         | 1037             | 1018             | 877                 |
| PrVF SwC-43 RNA1A  | KX192388         | 1037             | 1034             | 1013                |
| PrVF SwC-43 RNA1A  | KX192388         | 1037             | 839              | 1324                |
| PrVF SwC-43 RNA1A  | KX192388         | 1037             | 1038             | 6147                |
| PrVF SwC-43 RNA1A  | KX192388         | 1083             | 1019             | 723                 |
| PrVF SwC-43 RNA1A  | KX192388         | 1083             | 1018             | 779                 |
| PrVF SwC-43 RNA1A  | KX192388         | 1083             | 1034             | 915                 |
| PrVF SwC-43 RNA1A  | KX192388         | 1083             | 839              | 1226                |
| PrVF SwC-43 RNA1A  | KX192388         | 1083             | 1038             | 6049                |
| PrVF SwC-43 RNA1A  | KX192388         | 840              | 821              | 2956                |
| PrVF SwC-43 RNA1A  | KX192388         | 931              | 820              | 857                 |

| Target sequence   | Accession number | Fwd. primer name | Rev. primer name | Fragment length, bp |
|-------------------|------------------|------------------|------------------|---------------------|
| PrVF SwC-43 RNA1A | KX192388         | 931              | 952              | 1216                |
| PrVF SwC-43 RNA1A | KX192388         | 931              | 932              | 1507                |
| PrVF SwC-43 RNA1A | KX192388         | 931              | 953              | 2443                |
| PrVF SwC-43 RNA1A | KX192388         | 931              | 960              | 2500                |
| PrVF SwC-43 RNA1A | KX192388         | 931              | 1038             | 2577                |
| PrVF SwC-43 RNA1A | KX192388         | 823              | 820              | 781                 |
| PrVF SwC-43 RNA1A | KX192388         | 823              | 952              | 1140                |
| PrVF SwC-43 RNA1A | KX192388         | 823              | 932              | 1431                |
| PrVF SwC-43 RNA1A | KX192388         | 823              | 953              | 2367                |
| PrVF SwC-43 RNA1A | KX192388         | 823              | 960              | 2424                |
| PrVF SwC-43 RNA1A | KX192388         | 823              | 1038             | 2501                |
| PrVF SwC-43 RNA1A | KX192388         | 822              | 952              | 808                 |
| PrVF SwC-43 RNA1A | KX192388         | 822              | 932              | 1099                |
| PrVF SwC-43 RNA1A | KX192388         | 822              | 953              | 2035                |
| PrVF SwC-43 RNA1A | KX192388         | 822              | 960              | 2092                |
| PrVF SwC-43 RNA1A | KX192388         | 822              | 1038             | 2169                |
| PrVF SwC-43 RNA1A | KX192388         | 992              | 960              | 754                 |
| PrVF SwC-43 RNA1A | KX192388         | 992              | 1038             | 831                 |
| PrVF SwC-43 RNA2A | KX192391         | 1037             | 1010             | 822                 |
| PrVF SwC-43 RNA2A | KX192391         | 1037             | 1014             | 906                 |
| PrVF SwC-43 RNA2A | KX192391         | 1037             | 830              | 1418                |
| PrVF SwC-43 RNA2A | KX192391         | 1037             | 870              | 1651                |
| PrVF SwC-43 RNA2A | KX192391         | 954              | 953              | 1748                |
| PrVF SwC-43 RNA2A | KX192391         | 1037             | 1038             | 3586                |
| PrVF SwC-43 RNA2A | KX192391         | 954              | 1038             | 2031                |
| PrVF SwC-43 RNA2A | KX192391         | 961              | 953              | 1671                |
| PrVF SwC-43 RNA2A | KX192391         | 961              | 1038             | 1954                |
| PrVF SwC-43 RNA1B | KX192389         | 1037             | 1017             | 814                 |
| PrVF SwC-43 RNA1B | KX192389         | 1037             | 1018             | 872                 |
| PrVF SwC-43 RNA1B | KX192389         | 1037             | 1034             | 1008                |
| PrVF SwC-43 RNA1B | KX192389         | 1083             | 1017             | 721                 |
| PrVF SwC-43 RNA1B | KX192389         | 1083             | 1018             | 779                 |
| PrVF SwC-43 RNA1B | KX192389         | 1083             | 1038             | 6056                |
| PrVF SwC-43 RNA1B | KX192389         | 841              | 1034             | 739                 |
| PrVF SwC-43 RNA1B | KX192389         | 838              | 952              | 2230                |
| PrVF SwC-43 RNA1B | KX192389         | 838              | 932              | 2521                |
| PrVF SwC-43 RNA1B | KX192389         | 931              | 952              | 1216                |
| PrVF SwC-43 RNA1B | KX192389         | 931              | 932              | 1507                |
| PrVF SwC-43 RNA1B | KX192389         | 931              | 834              | 2273                |
| PrVF SwC-43 RNA1B | KX192389         | 931              | 953              | 2450                |
| PrVF SwC-43 RNA1B | KX192389         | 931              | 960              | 2507                |
| PrVF SwC-43 RNA1B | KX192389         | 931              | 1038             | 2584                |
| PrVF SwC-43 RNA1B | KX192389         | 962              | 834              | 1295                |
| PrVF SwC-43 RNA1B | KX192389         | 962              | 953              | 1472                |
| PrVF SwC-43 RNA1B | KX192389         | 962              | 960              | 1529                |
| PrVF SwC-43 RNA1B | KX192389         | 962              | 1038             | 1606                |
| PrVF SwC-43 RNA1B | KX192389         | 993              | 953              | 743                 |
| PrVF SwC-43 RNA1B | KX192389         | 993              | 960              | 800                 |
| PrVF SwC-43 RNA1B | KX192389         | 993              | 1038             | 877                 |
| PrVF SwC-43 RNA2B | KX192392         | 1037             | 1038             | 3449                |
| PrVF SwC-43 RNA2B | KX192392         | 1037             | 1010             | 842                 |
| PrVF SwC-43 RNA2B | KX192392         | 1037             | 830              | 1438                |
| PrVF SwC-43 RNA2B | KX192392         | 829              | 818              | 1748                |
| PrVF SwC-43 RNA2B | KX192392         | 829              | 953              | 1894                |
| PrVF SwC-43 RNA2B | KX192392         | 829              | 960              | 1951                |
| PrVF SwC-43 RNA2B | KX192392         | 829              | 1038             | 2028                |
| PrVF SwC-43 RNA2B | KX192392         | 959              | 818              | 1642                |
| PrVF SwC-43 RNA2B | KX192392         | 959              | 953              | 1788                |
| PrVF SwC-43 RNA2B | KX192392         | 959              | 960              | 1845                |
| PrVF SwC-43 RNA2B | KX192392         | 959              | 1038             | 1922                |
| PrVF SwC-43 RNA2B | KX192392         | 954              | 818              | 1594                |

| Target sequence   | Accession number | Fwd. primer name | Rev. primer name | Fragment length, bp |
|-------------------|------------------|------------------|------------------|---------------------|
| PrVF SwC-43 RNA2B | KX192392         | 954              | 953              | 1740                |
| PrVF SwC-43 RNA2B | KX192392         | 954              | 960              | 1797                |
| PrVF SwC-43 RNA2B | KX192392         | 954              | 1038             | 1874                |
| PrVF SwC-43 RNA2B | KX192392         | 819              | 960              | 756                 |
| PrVF SwC-43 RNA2B | KX192392         | 819              | 1038             | 833                 |
| PrVF SwC-43 RNA1C | KX192390         | 1037             | 1018             | 865                 |
| PrVF SwC-43 RNA1C | KX192390         | 1037             | 1034             | 1001                |
| PrVF SwC-43 RNA1C | KX192390         | 871              | 1018             | 847                 |
| PrVF SwC-43 RNA1C | KX192390         | 871              | 1034             | 983                 |
| PrVF SwC-43 RNA1C | KX192390         | 1083             | 1018             | 775                 |
| PrVF SwC-43 RNA1C | KX192390         | 1083             | 1034             | 911                 |
| PrVF SwC-43 RNA1C | KX192390         | 841              | 1034             | 739                 |
| PrVF SwC-43 RNA1C | KX192390         | 1150             | 952              | 1371                |
| PrVF SwC-43 RNA1C | KX192390         | 1150             | 932              | 1662                |
| PrVF SwC-43 RNA1C | KX192390         | 1150             | 933              | 1671                |
| PrVF SwC-43 RNA1C | KX192390         | 927              | 952              | 1300                |
| PrVF SwC-43 RNA1C | KX192390         | 927              | 932              | 1591                |
| PrVF SwC-43 RNA1C | KX192390         | 927              | 933              | 1600                |
| PrVF SwC-43 RNA1C | KX192390         | 931              | 952              | 1216                |
| PrVF SwC-43 RNA1C | KX192390         | 931              | 932              | 1507                |
| PrVF SwC-43 RNA1C | KX192390         | 931              | 933              | 1516                |
| PrVF SwC-43 RNA2C | KX192393         | 1037             | 1010             | 819                 |
| PrVF SwC-43 RNA2C | KX192393         | 1037             | 1038             | 3740                |
| PrVF SwC-43 RNA2C | KX192393         | 1037             | 830              | 1415                |
| PrVF SwC-43 RNA2C | KX192393         | 827              | 1009             | 703                 |
| PrVF SwC-43 RNA2C | KX192393         | 827              | 830              | 1200                |
| PrVF SwC-43 RNA2C | KX192393         | 958              | 957              | 1951                |
| PrVF SwC-43 RNA2C | KX192393         | 958              | 953              | 1985                |
| PrVF SwC-43 RNA2C | KX192393         | 958              | 1038             | 2437                |
| PrVF SwC-43 RNA2C | KX192393         | 829              | 957              | 1856                |
| PrVF SwC-43 RNA2C | KX192393         | 829              | 953              | 1890                |
| PrVF SwC-43 RNA2C | KX192393         | 829              | 1038             | 2342                |
| PrVF SwC-43 RNA2C | KX192393         | 954              | 957              | 1702                |
| PrVF SwC-43 RNA2C | KX192393         | 954              | 953              | 1736                |
| PrVF SwC-43 RNA2C | KX192393         | 954              | 1038             | 2188                |
